# Supplementary material for: The Associations of Gram-Positive Cocci and Gram-Negative Rods with Disease Severity and Mortality in Critically Ill Patients: A Retrospective Cohort Study
Source: Research Square preprint supplement (doi:10.21203/rs.3.rs-6632548/v1), 2025-05-20
Supplement: Supplementary file 1 [file 9655ed5c7583681f37c4219e.docx]

**Supplement Table 1: Proportions of Missing Data in Patient Characteristics on admission**

| **Variable** | **Missing Data (n/N, %)** |
| --- | --- |
| qSOFA | 86/259 (33.2%) |
| Consciousness level | 72/259 (27.8%) |
| Lactate | 20/259 (7.7%) |
| Respiratory rate | 24/259 (9.3%) |
| SpO2 | 24/259 (9.3%) |
| Mean blood pressure | 10/259 (3.9%) |
| Pulse rate | 9/259 (3.5%) |
| Sodium | 5/259 (1.9%) |
| Potassium | 5/259 (1.9%) |
| Bilirubin | 4/259 (1.5%) |
| White blood cell count | 3/259 (1.2%) |
| Hemoglobin | 3/259 (1.2%) |
| Albumin | 3/259 (1.2%) |
| Blood urea nitrogen | 3/259 (1.2%) |
| Creatinine | 3/259 (1.2%) |
| C-reactive protein | 3/259 (1.2%) |
| Age | 0/259 (0%) |
| Sex | 0/259 (0%) |
| Suspected infection organ | 0/259 (0%) |
| Immunosuppressants | 0/259 (0%) |
| Malignancy | 0/259 (0%) |
| Hemodialysis | 0/259 (0%) |
| Catheter/devices | 0/259 (0%) |
| Antibiotic change | 0/259 (0%) |
| In-hospital death within 7 days | 0/259 (0%) |
| In-hospital death within 28 days | 0/259 (0%) |
| Sepsis | 0/259 (0%) |
| Septic Shock | 0/259 (0%) |

**Supplement table 2. The modified sepsis clinical surveillance definition**

| **1. Presumed serious infection:** |
| --- |
| ・Blood culture obtained (regardless of results), AND  ・New antibiotics administration started within ± 2 days of blood culture day |
| AND |
| **2. ICU admission** |
| AND |
| **3. Acute organ dysfunction (any 1 of the following criteria within 2 days of blood culture day):** |
| ・Vasopressors initiation (norepinephrine, dopamine, epinephrine, phenylephrine, or vasopressin)  ・Initiation of mechanical ventilation  ・Doubling in serum creatinine level compared to the baseline*  ・Total bilirubin level ≥2.0 mg/dL and doubling from the baseline*  ・Platelet count <100 ×103 /μL and ≥50% decline from the baseline (baseline must be ≥100 ×103 /μL)  ・Serum lactate ≥2.0 mmol/L    * Baseline laboratory values are defined as the best values during the hospitalization even if the baseline  values are assumed based on the previous chart record. |

According to the Sepsis-3 criteria, sepsis is defined as infection-induced life-threatening organ dysfunction, which is estimated based on ≥ 2-point increase in the Sequential Organ Failure Assessment (SOFA) score. Since this assessment is not accurately available in the setting of retrospective studies, Rhee C et al. proposed a new definition for retrospective surveillance using electrical health records. Using the definition by Rhee C et al., we created the modified sepsis clinical surveillance definition to identify the incidence of sepsis among patients with suspected infection presenting to the emergency department.
